# Supplementary material
Source: PubMed Central journal article supplement (PMC5865262)
Supplement: Supp_Table3.pdf [file Supp_Table3.pdf]

| Cytokine (pg/mL) | 16C176  |          | 16C215  |         | 16C116  |          |
|------------------|---------|----------|---------|---------|---------|----------|
|                  | Day 0   | Day 4    | Day 0   | Day 7   | Day 0   | Day 7    |
| GM-CSF           | 0.32    | 7.005    | 0       | 67.61   | 0.63    | 1.575    |
| IL-6             | 0.185   | 6489.895 | 0.08    | 0.935   | 0       | 0        |
| IL-17A           | 0.145   | 2.525    | 0       | 0.29    | 0.09    | 0.29     |
| MIP-1a           | 1.475   | 16.35    | 0       | 7.24    | 6.01    | 9.075    |
| MIP-1B           | 0       | 21.31    | 0       | 8.16    | 0       | 0        |
| MCP-1            | 172.05  | 2781.83  | 215.905 | 251.03  | 324.04  | 319.73   |
| IL-5             | 1.02    | 3.89     | 0       | 0.79    | 1.02    | 5.07     |
| VEGF             | 23.65   | 190.94   | 0       | 59.955  | 0       | 0        |
| IFN-r            | 0       | 0        | 0       | 0       | 0       | 0        |
| TNF- $\alpha$    | 6.885   | 73.985   | 0       | 0       | 0       | 6.96     |
| IL-4             | 0.645   | 62.75    | 0       | 0       | 7.865   | 30.315   |
| IL-8             | 47.04   | 8665.465 | 27.635  | 36.695  | 26.9    | 30.1     |
| TGF $\alpha$     | 0       | 46.43    | 0       | 0.065   | 0       | 0.025    |
| G-CSF            | 0       | 96.76    | 0       | 29.825  | 0       | 5.115    |
| IL-2             | 24.055  | 102.42   | 23.22   | 35.215  | 26.515  | 27.05    |
| IL-10            | 15.565  | 199.95   | 5.255   | 26.43   | 12.215  | 20.975   |
| IL-15            | 4.37    | 57.94    | 6.85    | 8.385   | 4.93    | 6.71     |
| IL-1ra           | 18.04   | 4234.035 | 14.725  | 36.205  | 19.54   | 19.84    |
| IL-13            | 0       | 24.34    | 0       | 0       | 0       | 6.955    |
| IL-1B            | 0.24    | 13.43    | 0       | 0.895   | 0.08    | 0.405    |
| IL-12/23 p40     | 0       | 63.805   | 0       | 21.75   | 0       | 0        |
| sCD40L           | 83.095  | 105.935  | 27.91   | 112.87  | 189.425 | 272.79   |
| IL-18            | 72.485  | 781.91   | 31.9    | 34.955  | 34.39   | 5.77     |
| TGF $\beta$ 1    | 4371.71 | 11174.16 | 2014.92 | 4011.59 | 8135.14 | 10038.39 |
| TGF $\beta$ 2    | 1358.78 | 3831.6   | 723.86  | 1166.23 | 1692.82 | 2129.52  |
| TGF $\beta$ 3    | 0       | 33.53    | 0       | 0       | 0       | 0        |

**Table S3.** Serum cytokines in NHPs following AAV treatment. Cytokines were measured in samples collected at baseline and at necropsy (Study Day 4, 16C176) or Study Day 7 (16C116, 16C215).
