# Supplementary material
Source: PubMed Central journal article supplement (PMC5865262)
Supplement: Supp_Table9.pdf [file Supp_Table9.pdf]

| Animal                    | Piglet A |      |       | Piglet B |      |      | Piglet C |      |      |
|---------------------------|----------|------|-------|----------|------|------|----------|------|------|
|                           | 0        | 7    | 14    | 0        | 7    | 13   | 0        | 7    | 13   |
| WBC (10 <sup>3</sup> /μL) | 12.6     | 8.1  | 27.4  | 14.9     | 14   | 10.2 | 13.3     | 14   | 11   |
| RBC (10 <sup>6</sup> /μL) | 5.3      | 5.7  | 6.8   | 6.6      | 5.9  | 5.8  | 6.7      | 6.4  | 6.3  |
| HGB (g/dL)                | 11.1     | 10.8 | 12.9  | 12.9     | 11   | 10.7 | 13.4     | 12.8 | 12   |
| HCT (%)                   | 39       | 38   | 43    | 43       | 35   | 35   | 43       | 38   | 37   |
| PLT (10 <sup>6</sup> /μL) | 599      | 412  | 441   | 295      | 1047 | 749  | 576      | 425  | 553  |
| NEU/μL                    | 6678     | 2430 | 22468 | 7748     | 5320 | 4080 | 6916     | 5880 | 4218 |
| LYMPH/μL                  | 5544     | 4941 | 3836  | 6556     | 7980 | 5610 | 6251     | 7420 | 6726 |
| MONO/μL                   | 252      | 324  | 822   | 596      | 560  | 510  | 133      | 420  | 342  |
| EOS/μL                    | 126      | 405  | 0     | 0        | 140  | 0    | 0        | 280  | 114  |
| BAS/μL                    | 0        | 0    | 274   | 0        | 0    | 0    | 0        | 0    | 0    |
| TPRO (g/dL)               | 5.4      | 4.8  | 5     | 4.1      | 4.7  | 5    | 4.9      | 5    | 5.2  |
| ALB (g/dL)                | 2        | 2.5  | 2.6   | 2.4      | 2.9  | 3.5  | 3.6      | 3.5  | 3.9  |
| GLOB (g/dL)               | 3.4      | 2.3  | 2.4   | 1.7      | 1.8  | 1.5  | 1.3      | 1.5  | 1.3  |
| AST (IU/L)                | 63       | 26   | 27    | 41       | 47   | 24   | 38       | 32   | 18   |
| ALT (IU/L)                | 17       | 12   | 18    | 40       | 49   | 50   | 47       | 49   | 47   |
| ALP (IU/L)                | 403      | 338  | 237   | 109      | 102  | 210  | 228      | 136  | 145  |
| GGTP (IU/L)               | 71       | 33   | 43    | 56       | 47   | 47   | 55       | 42   | 44   |
| TBIL (mg/dL)              | 0.1      | 0.1  | 0.1   | 0.2      | 0.1  | 0.1  | 0.2      | 0.1  | 0.1  |
| BUN (mg/dL)               | 6        | 10   | 7     | 21       | 14   | 21   | 10       | 16   | 18   |
| CREA (mg/dL)              | 0.7      | 0.7  | 0.5   | 0.3      | 0.3  | 0.4  | 0.5      | 0.4  | 0.4  |
| P (mg/dL)                 | 10.9     | 9.1  | 10.1  | 7.7      | 8.8  | 8.2  | 9        | 7.6  | 7.3  |
| GLU (mg/dL)               | 77       | 109  | 96    | 68       | 78   | 92   | 119      | 69   | 91   |
| CA (mg/dL)                | 9.5      | 10.7 | 10    | 9.2      | 10   | 11   | 9.9      | 10.4 | 11   |
| MG (mg/dL)                | 2.4      | 2.1  | 1.8   | 2        | 2    | 2.5  | 1.6      | 1.7  | 1.9  |
| NA (mEq/L)                | 141      | 145  | 138   | 135      | 136  | 146  | 138      | 138  | 141  |
| K (mEq/L)                 | 5.1      | 5    | 4.2   | 4.8      | 4    | 4.1  | 4.3      | 3.9  | 4.1  |
| CL (mmol/L)               | 101      | 107  | 99    | 99       | 99   | 103  | 99       | 100  | 102  |
| CHOL (mg/dL)              | 98       | 90   | 78    | 67       | 79   | 73   | 75       | 83   | 87   |
| TRIG (mg/dL)              | 24       | 77   | 40    | 86       | 52   | 18   | 76       | 57   | 26   |
| AMY (U/L)                 | 953      | 1042 | 1135  | 837      | 901  | 1244 | 554      | 495  | 515  |
| CPK                       | 1279     | 234  | 227   | 396      | 970  | 305  | 326      | 487  | 355  |
| PT (s)                    | ND       | ND   | ND    | 9        | 8.5  | 8.7  | 17.4     | 8    | 9.7  |
| PTT (s)                   | ND       | ND   | ND    | 15.8     | 16   | 13.5 | 18.3     | 11.2 | 14   |
| Fibrinogen (mg/dL)        | ND       | ND   | ND    | 153      | 134  | 162  | ND       | 132  | 121  |
| D-dimer (ng/mL)           | ND       | ND   | ND    | 118      | 95   | 106  | 129      | 658  | 84   |

**Table S9.** Clinical pathology values for piglets treated with intravenous AAVhu68 expressing human SMN. ND = not done.
